# Supplementary material for: Charge transfer from internal electrostatic fields is superior to surface defects for 2,4-dichlorophenol degradation in K3−xNaxB6O10Br photocatalysts
Source: Royal Society of Chemistry journal article supplement (doi:10.1039/c8nr07823h), 2018-01-01
Supplement: c8nr07823h1.pdf [file c8nr07823h1.pdf]

## Supplementary Information

### **Charge transfer from internal electrostatic fields is superior to surface defects for the 2, 4- dichlorophenol degradation in $K_{3-x}Na_xB_6O_{10}Br$ photocatalysts**

Xiaoyun Fan\*<sup>a</sup>, Yang Zhang <sup>a</sup>, Kangdi Zhong <sup>b</sup>

<sup>a</sup> School of Environment, Jinan University, Guangzhou 510632, China

<sup>b</sup> Department of Physics, Changji University, Changji, 830011, China.

E-mail: xyfan@jun.edu.cn;

**1.1 Photoelectron chemical (PEC) measurements** The photocurrents of UV-Vis light on and off studies were determined on a CHI660E electrochemical system using a standard three-electrode cell with a working electrode (10 mm ×10 mm), a platinum plate as the counter electrode, and a standard calomel electrode (SCE) as the reference electrode. The KBB film was prepared on ITO glass, followed by air-drying. The experiments were performed in a 50 mL quartz cylinder reactor which was placed in front of a xenon lamp ( $\lambda > 320$  nm; Perfect Light Company, Beijing, China). The photoelectron chemical (PEC) activities of the samples were all evaluated in a 0.1 M Na<sub>2</sub>SO<sub>4</sub> solution.

**1.2 Photocatalytic Activity.** Typically, 50 mg catalysts were added into 100 mL aqueous solution of 2, 4-DCP (50 mg / L) in a 250 mL glass beaker, then stirred for 20 min in the dark to attain adsorption equilibrium, and irradiated by a xenon lamp (the light intensity at the test samples= 0.185 W/cm<sup>2</sup>). The percentage of residual contaminants solution at a selected time of irradiation is given by  $C/C_0$ , where  $C_0$  is the concentration of the contaminants solution at the initial stage, and  $C$  is the concentration at selected irradiation times. To test the reproducibility and uncertainty of the degradation experiments, the photochemical reactions were repeated four times.

**1.3 Structure description.** For an ideal ABO<sub>3</sub>-type perovskite structure, such as CaTiO<sub>3</sub>, the corners of the cubic cell are occupied by Ca<sup>2+</sup> ions with coordination number 12, and the sites of the face centers are occupied by O<sup>2-</sup> ions with coordination number 6, while the bulk center is occupied by a Ti<sup>4+</sup> ion with coordination number 6. Ti<sup>4+</sup> and six neighboring O<sup>2-</sup> ions form an octahedron TiO<sub>6</sub>, as schematically drawn in Figure S1a. The structure exhibits an intricate three-dimensional network composed of [B<sub>6</sub>O<sub>10</sub>] units and [BrK<sub>6</sub>] octahedra (Figure S1b) and can also be described as two networks (a [B<sub>6</sub>O<sub>10</sub>]<sub>∞</sub> and a BrK<sub>6</sub> net) that are interweaved. By analogy with the mineral perovskite CaTiO<sub>3</sub>, the positions of large calcium cations are occupied by the [B<sub>6</sub>O<sub>10</sub>] groups, the positions of titanium atoms are similar to those of bromine atoms, and the positions of oxygen atoms are similar to the positions of potassium atoms. Here, for the perovskite compounds KBB1, the site of the bulk center is occupied by [B<sub>6</sub>O<sub>10</sub>] in a charge-balanced manner, which has been widely investigated in ferroelectric materials.

With the variation of the ionic radius of  $\text{Br}^-$  and  $\text{K}^+$ , the crystal structure of  $\text{ABO}_3$  perovskite will be subjected to some distortion, Hence, their formulas can be represented as  $[\text{B}_6\text{O}_{10}]\text{BrK}_3$ .

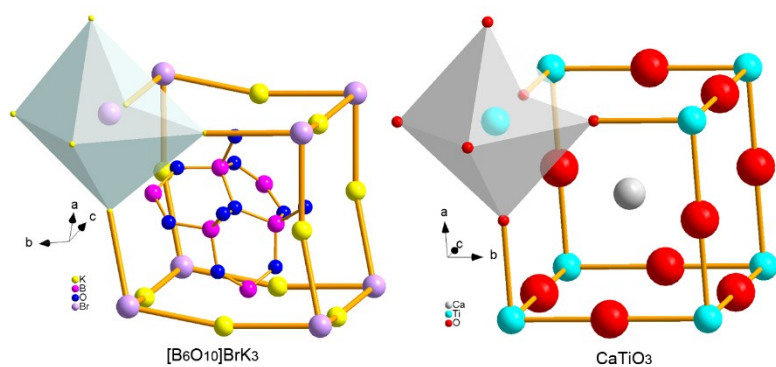

**Figure S1.** Similarity of the KBB1-KBB3 crystal structure and the classic R3m perovskite structure of CaTiO<sub>3</sub> compound.

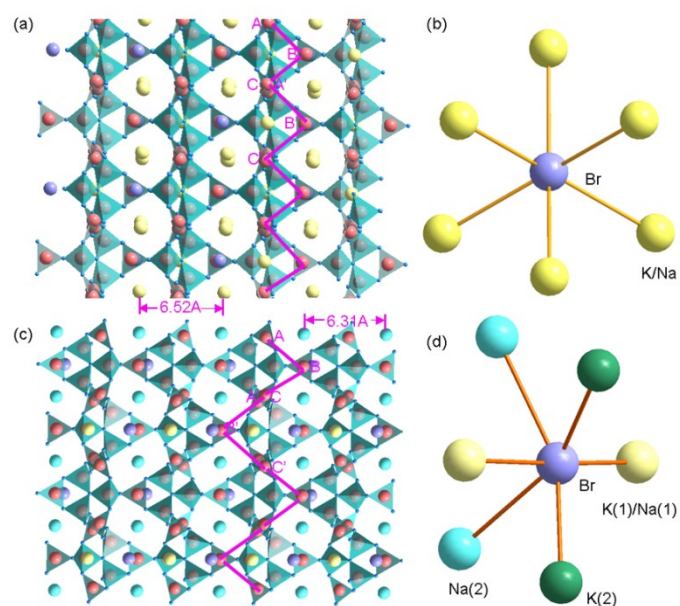

**Figure S2.** 3D framework of the KBB3 crystal (a) and KBB4 crystal(c), The coordination environment of Br in the KBB3 sample(b) and KBB4 sample(d).

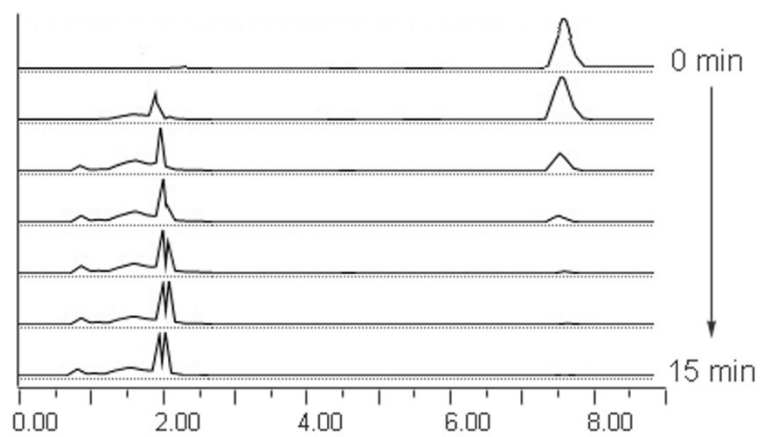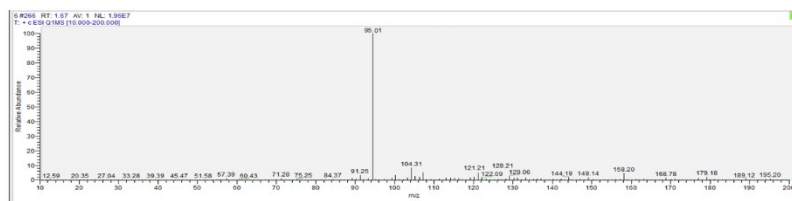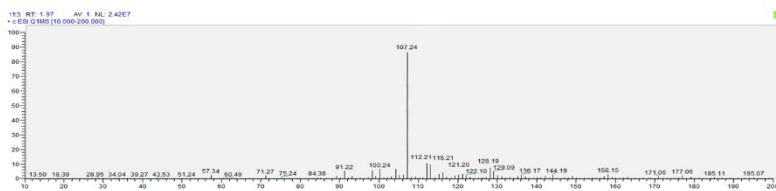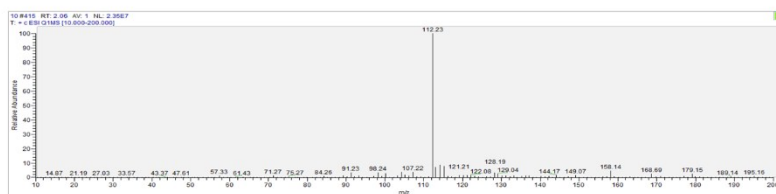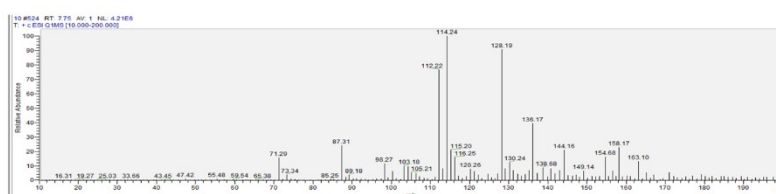

**Figure S3.** HPLC and LC-MS of 2, 4-DCP ( $R_t \approx 7.3$ -7.8 min) by using KBB3 sample under UV-vis light irradiation.

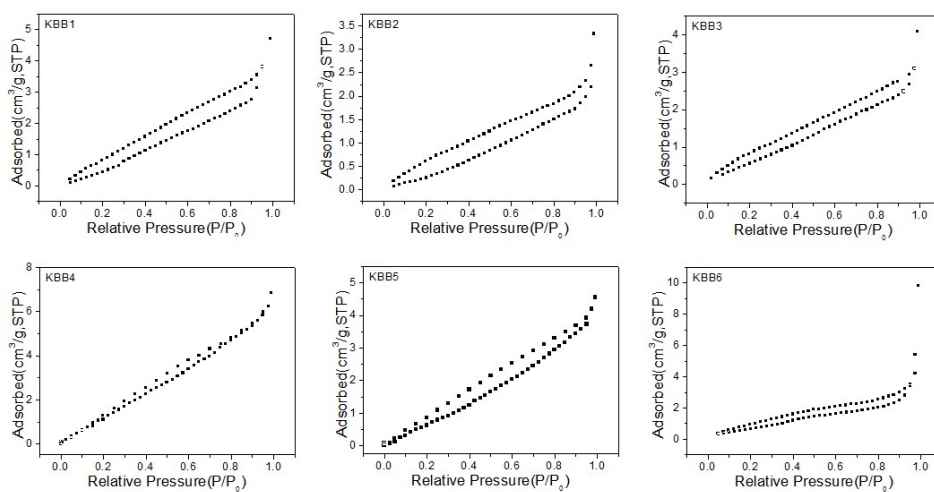

**Figure S4.** Nitrogen adsorption-desorption isotherms of KBB1-KBB6 samples.

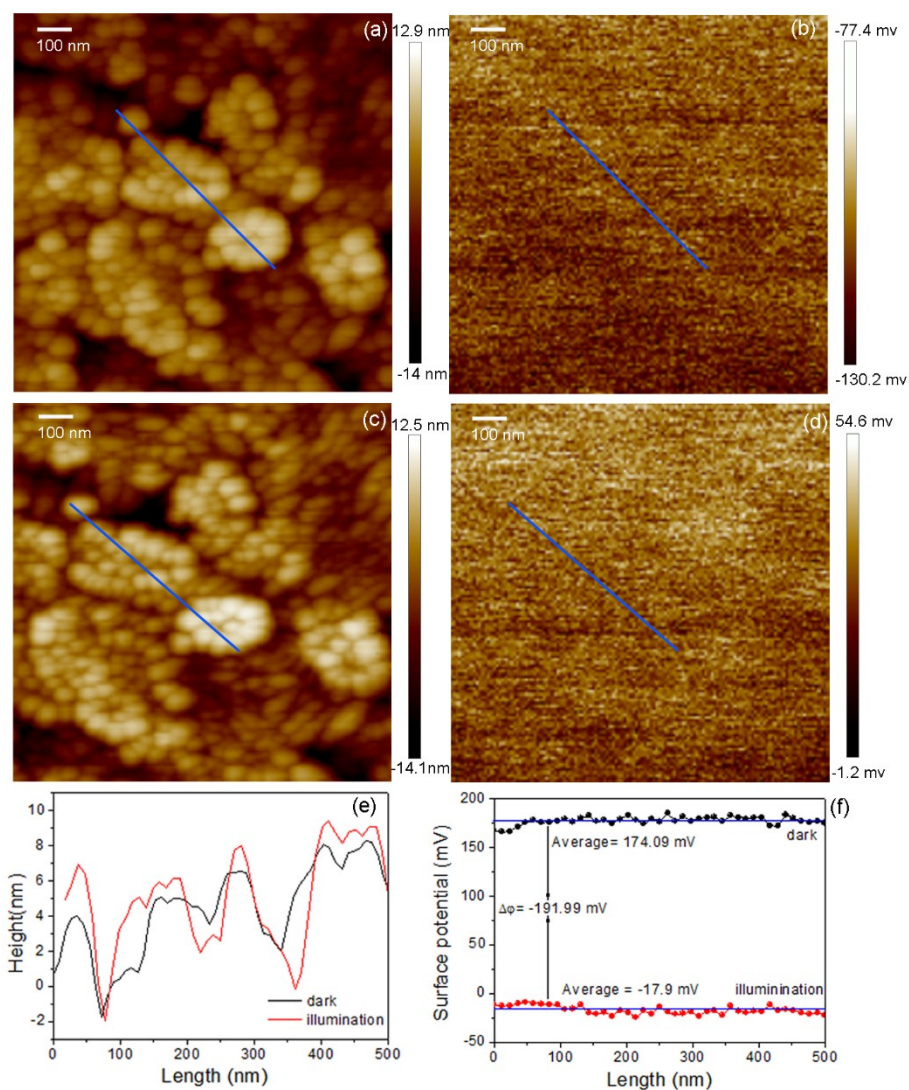

**Figure S5.** AFM images of KBB3 before (a) and after (c) UV-visible light irradiation and corresponding surface potential images of KBB3 before (b) and after (d) UV-visible light irradiation. (e) Height differential curve along the blue line from panel a and panel c. (f) Surface potential profile along the blue line in panel b and panel d.

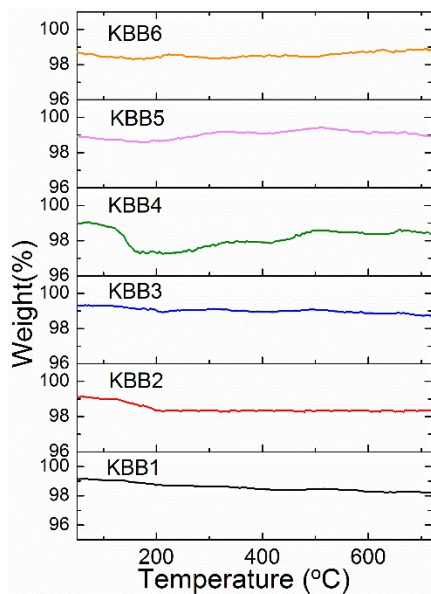

**Figure S6.** The TGA curve for the KBB1-KBB6 samples in the air.

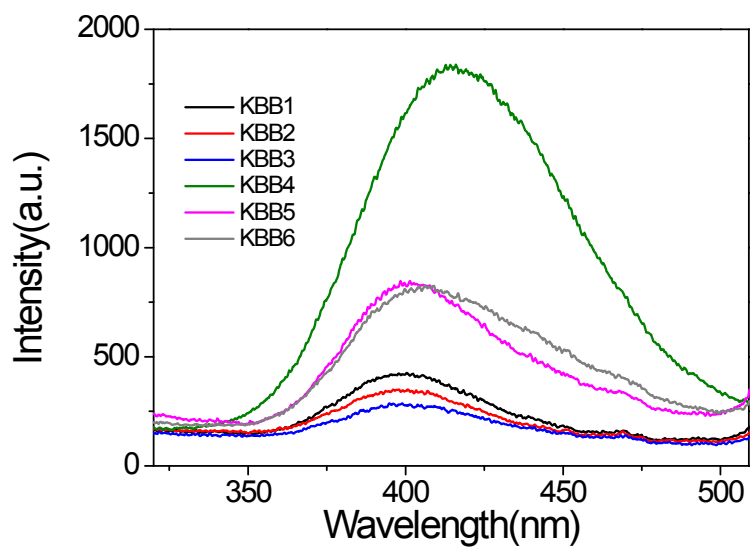

**Figure S7.** Photo luminescence spectra of the KBB1-KBB6 samples.



**Table S1.** Raman shifts, IR frequency ( $\text{cm}^{-1}$ ) and the assignment of vibrational modes of the KBB1-KBB6 photocatalyst.

| Raman frequency |               | IR frequency  |               | Vibrational modes                 |
|-----------------|---------------|---------------|---------------|-----------------------------------|
| KBB1-<br>KBB3   | KBB4-<br>KBB6 | KBB1-<br>KBB3 | KBB4-<br>KBB6 |                                   |
| 58-105          | 176- 72       | -             | -             | Lattice vibration                 |
| 238-347         | 240-363       | 564,567       | 521,575       | $\text{BO}_4$ bond bending        |
| 597-478         | 445-590       | 594           | 593           | $\text{BO}_4$ symmetric vibration |
| 630-750         | 630-716       | 681-731       | 624-788       | $\text{BO}_3$ bending vibration   |
| 809             | 800-823       | 826-990       | 853-896       | $\text{BO}_3$ symmetric stretch   |
| 1001-1149       | 1015-1169     | 1162-1167     | 1077-1185     | $\text{BO}_4$ asymmetric stretch  |
| 1312            | 1349          | 1299          | 1317          | $\text{BO}_3$ asymmetric stretch  |

**Table S2.** LC-MS data of photodegraded products of 2, 4-DCP by using KBB3 sample.

| Retention time<br>(min) | Mw<br>(m/z) | Assignment              | CAS no.  |
|-------------------------|-------------|-------------------------|----------|
| 7.55                    | 163.10      | 2, 4-<br>dichlorophenol | 120-83-2 |
| 2.06                    | 112.23      | Catechol                | 120-80-9 |
| 1.97                    | 107.24      | 1,4-Benzoquinone        | 106-51-4 |
| 1.67                    | 95.01       | Phenol                  | 108-95-2 |
